# Supplementary material for: Central motor conduction time in spinocerebellar ataxia: a meta-analysis
Source: publisher site journal article supplement (doi:10.18632/aging.104181), 2020-11-20
Supplement: Supplementary file [file aging-v12i24-104181-supplementary-material-SD2.pdf]

## SUPPLEMENTARY TABLE

**Supplementary Table 1. Modified Newcastle-Ottawa Quality Assessment Scale.**

| Study                      | Selection | Comparability | Outcome | Total number of stars |
|----------------------------|-----------|---------------|---------|-----------------------|
| T Yokota(1998)             | ★★★       | ★             | ★       | 5                     |
| Peter Schwenkreis(2002)    | ★★★       | ★★            | ★       | 6                     |
| Kenji Sakuma(2005)         | ★★★       | ★             | ★       | 5                     |
| D.A. Restivo(2000)         | ★★★       | ★★            | ★       | 6                     |
| Ketan Jhunhunwala(2013)    | ★★★       | ★             | ★       | 5                     |
| Michelle A. Farrar(2016)   | ★★★       | ★★            | ★       | 6                     |
| Jen-Tse Chen(2004)         | ★★★       | ★★            | ★       | 6                     |
| Luis Velázquez-Pérez(2016) | ★★★       | ★★            | ★       | 6                     |

A maximum of 6 stars can be granted in total. Selection=maximum of 3 stars. Comparability = maximum of 2 stars. Outcome = maximum of 1 star.
